# Supplementary material for: Study on Dynamic Crack Expansion and Size Effect of Back–Filling Concrete under Uniaxial Compression
Source: MDPI journal article supplement (doi:10.3390/ma16237503), 2023-12-04
Supplement: s1 [file s1]

Table S1. Dynamic crack test results of back-filling concrete samples

| Pattern                                                                             | Number of cracks |     | F-Meature | mAp@0.5 | GIoU loss |
|-------------------------------------------------------------------------------------|------------------|-----|-----------|---------|-----------|
|                                                                                     | TF               | CSF |           |         |           |
| 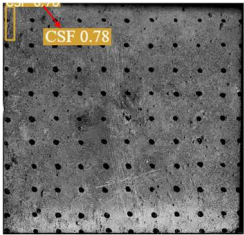   | 0                | 1   | 75%       | 71%     | 0.038     |
|    | 2                | 1   |           |         |           |
|   | 7                | 4   |           |         |           |
|  | 9                | 4   |           |         |           |

Note: Two colors of the prediction box: green and yellow correspond to two different types of cracks: TF and CSF; The value in the prediction box is confidence.
